# Supplementary material for: The microstructure and protective properties of electroplating zinc films on NdFeB from a chloride-free nonaqueous bath
Source: Royal Society of Chemistry journal article supplement (doi:10.1039/d3ra08850b), 2024-01-01
Supplement: d3ra08850b1.pdf [file d3ra08850b1.pdf]

## The Microstructure and Protective Properties of Electroplating Zinc Films on NdFeB Magnet from a Chloride-free Nonaqueous Solution

Li Xiaoya, Ma Yongcun, Peng Shusen\*, Tian lixi

School of Materials Science and Engineering, Jiangxi Provincial Engineering Research Center for Surface Technology of Aeronautical Materials, Nanchang Hangkong University, Nanchang 330063, China

Corresponding Author\*: E-mail [pengshs@nchu.edu.cn](mailto:pengshs@nchu.edu.cn)

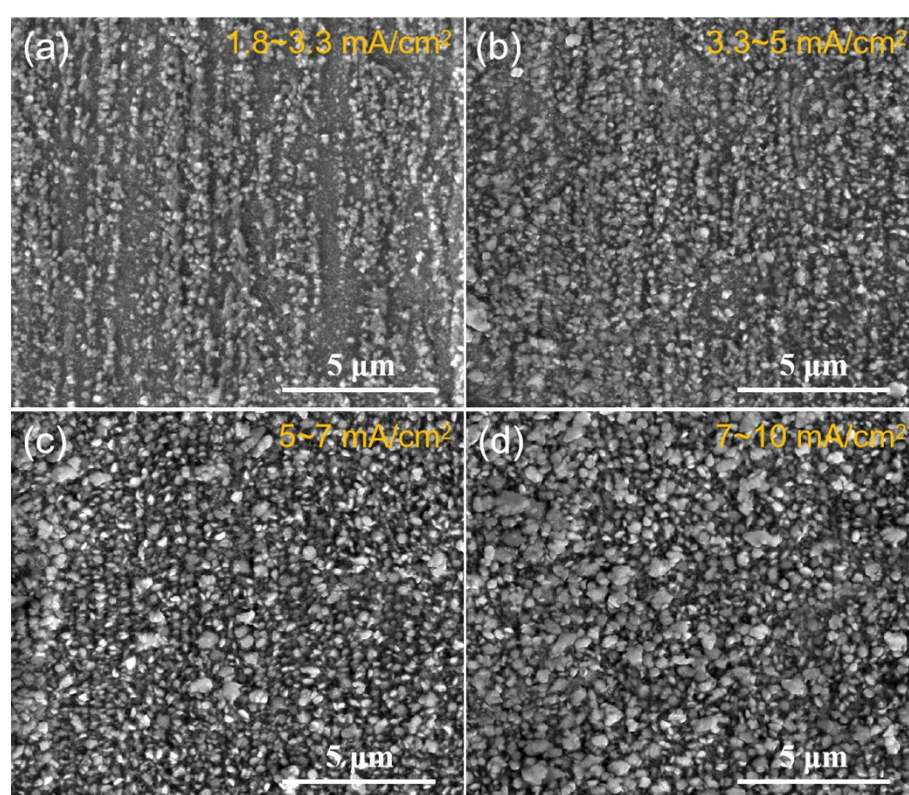

**Figure S1** SEM surface morphology of Zn film at different distances from the proximal cathode electroplating from the 0.1M-EG bath: (a) 7-8 cm, (b) 6-7 cm, (c) 5-6 cm and (d) 4-5 cm.

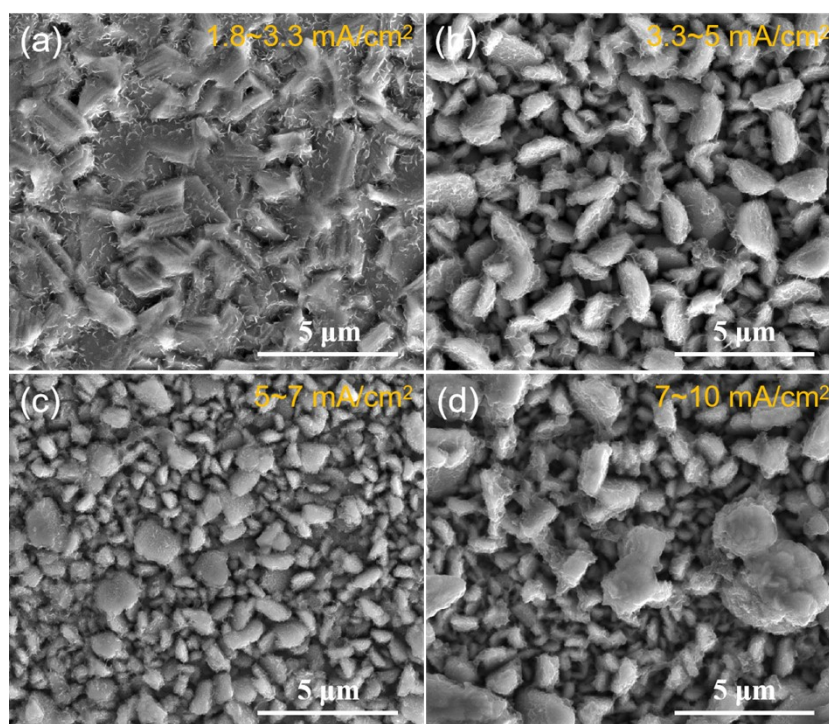

**Figure S2** SEM surface morphology of Zn film at different distances from the proximal cathode electroplating from the 0.3M-EG bath: (a) 7-8 cm, (b) 6-7 cm, (c) 5-6 cm and (c) 4-5 cm.

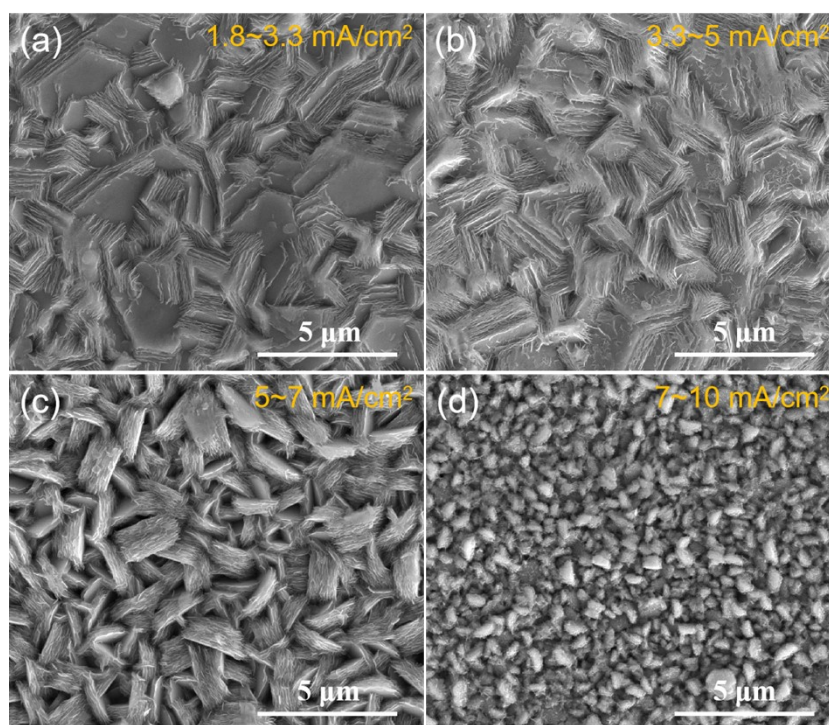

**Figure S3** SEM surface morphology of Zn film at different distances from the proximal cathode electroplating from the 0.5M-EG bath: (a) 7-8 cm, (b) 6-7 cm, (c) 5-6 cm and (c) 4-5 cm.



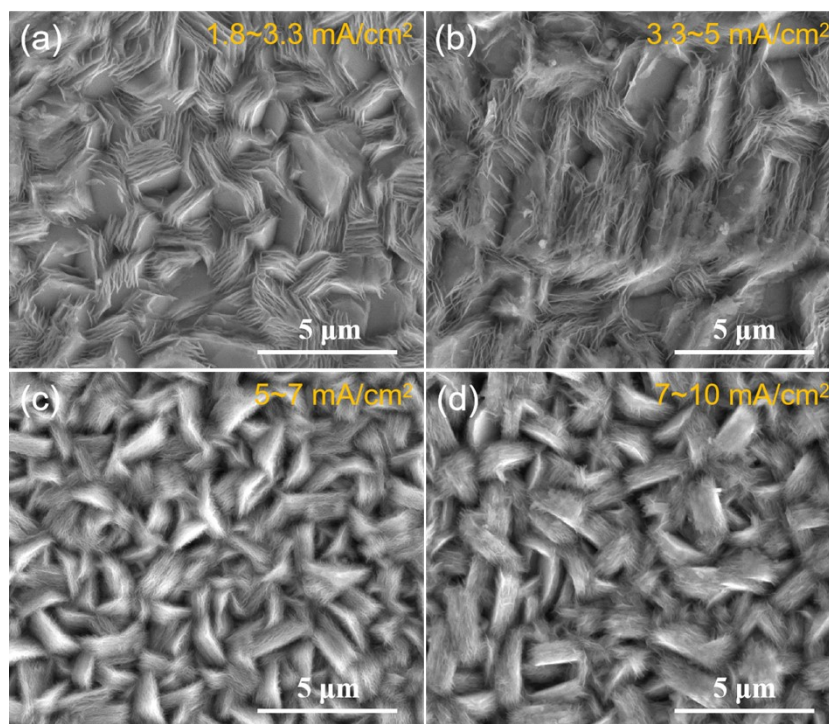

**Figure S4** SEM surface morphology of Zn film at different distances from the proximal cathode electroplating from the 0.7M-EG bath: (a) 7-8 cm, (b) 6-7 cm, (c) 5-6 cm and (d) 4-5 cm.

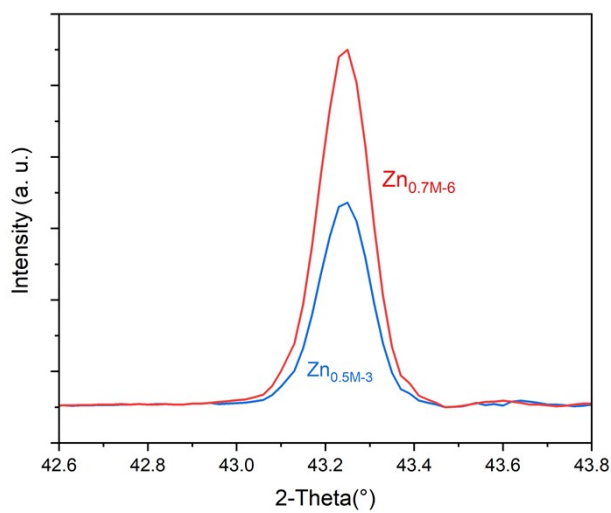

**Figure S5** The (002) reflection of  $Zn_{0.5M-3}$  and  $Zn_{0.7M-7}$  film on brass with corresponding FWHM.

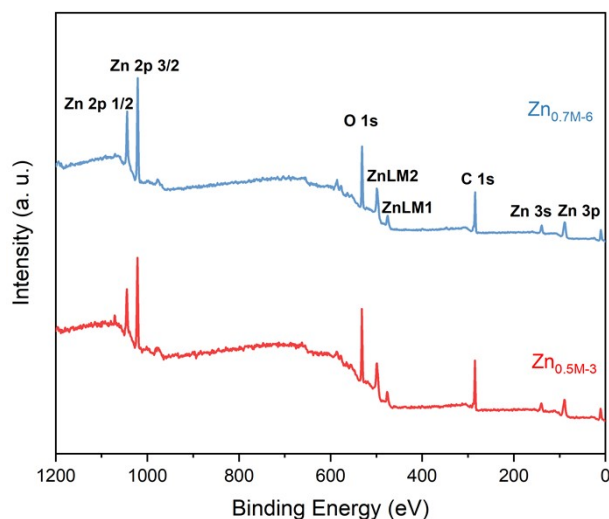

**Figure S6** The full-scale XPS spectra of  $Zn_{0.5M-3}$  and  $Zn_{0.7M-6}$  film.

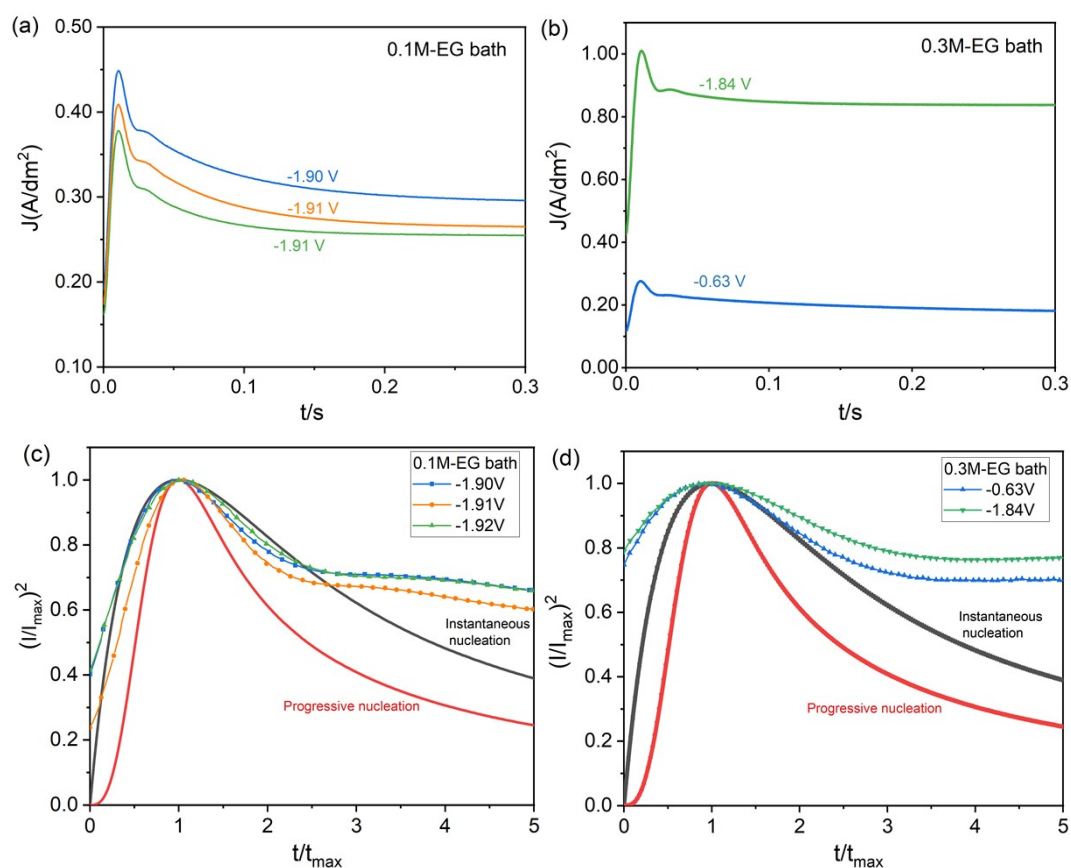

**Figure S6**

**Figure S7** The variation of current density with deposition time at different deposition potentials (a) in the 0.1M-EG bath and (b) in the 0.3M-EG bath (60 °C, vs Ag/AgCl). The fitting results of  $(I/I_{\max})^2$  vs.  $t/t_{\max}$  (c) the 0.1M-EG bath and (d) the 0.3M-EG bath.

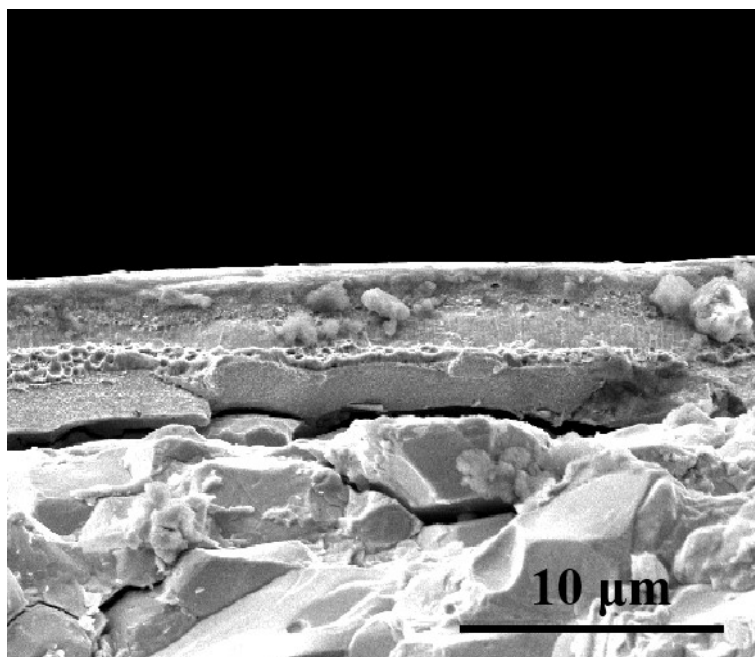

**Figure S8** The cross-section morphology of the deposited Zn film on NdFeB from an aqueous alkaline zinc plating bath

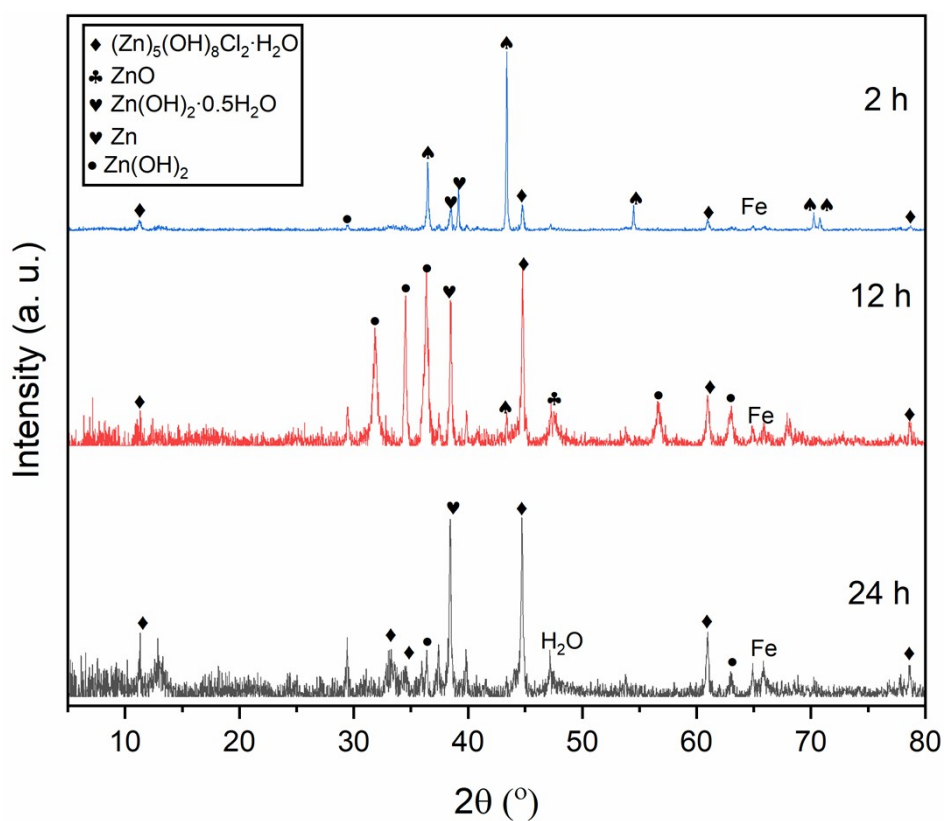

**Figure S9** XRD of the deposited Zn<sub>0.7M-6</sub> film after immersing in 3.5 wt.% NaCl at different times.

From Figure S9 , it can be observed that there are some Zn(OH)<sub>2</sub>·0.5H<sub>2</sub>O and Zn(OH)<sub>2</sub> in the initial stage of corrosion, and most of the Zn coating still exists

without losing its crystal structure and characteristics. Over time, a large amount of  $Zn_5(OH)_8Cl_2 \cdot H_2O$  and  $Zn(OH)_2$ , as well as some  $Zn(OH)_2 \cdot 0.5H_2O$ , began to appear in the film. In the end, only  $Zn_5(OH)_8Cl_2 \cdot H_2O$  remained the corrosion product. It is speculated that the following reaction occurred:

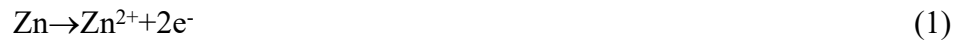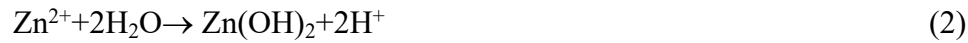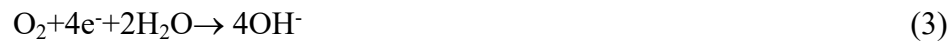

As the immersing time prolongs, the concentration of  $OH^-$  in the solution increases, resulting in the continuous generation of  $Zn(OH)_2$  and  $Zn(OH) \cdot 0.5H_2O$ . Due to the continuous consumption of  $OH^-$  by  $Zn^{2+}$ , the reaction (2) continues to proceed. This is also why  $Zn_5(OH)_8Cl_2 \cdot H_2O$  constantly increases.
